# Supplementary material
Source: Springer Nature journal article supplement (https://www.springermedizin.de/resource/supplementary/13063_2011_1134_MOESM1_ESM.pdf/9619276)
Supplement: MOESM1 [file 9619276]

Daily admissions report

Identify smokers from the medical record

Patient <18 years old

Has not smoked a cigarette within one month prior to hospitalization

Projected hospital stay of less than 24 hours

Research Assistant visit/screening

Refuse to participate

Concurrent smoking trial

Non-English speaking

Unavailable to participate

Not cognitively able to participate

Not physically able to participate

Not willing to complete the questionnaires

**Study Consent  
n=2,350**

**Baseline Assessment**

**30-Day Follow-Up**

**6-Month Follow-Up**
